# Supplementary material for: Unexpected similarities between the Schizosaccharomyces and human blood metabolomes, and novel human metabolites
Source: Royal Society of Chemistry journal article supplement (doi:10.1039/c4mb00346b), 2014-07-02
Supplement: c4mb00346b4.xlsx [file c4mb00346b4.xlsx]

## Sheet: Table S1
	Table S1. List of 18 identified metabolites detected in fission yeast, but not in blooda
	Compound	Status	Peak area Fission yeast	Detected in WBC
	Nucleotides
	3',5'-cAMP	STD	L	
	CMP	STD	L	
	Nucleosides, nucleobases and derivatives
	AICAR	STD	L
	PRPP (5-Phospho-alpha-D-ribose 1-diphosphate)	STD	M	
	SAICAR	MS/MS	L
	Vitamins, Coenzymes
	Acetyl-CoA	STD	L	
	Biotin	STD	L
	CoA	STD	L	
	FAD	STD	L	
	HMG-CoA	STD	L	
	Sugar phosphates
	Trehalose-6-phosphate	STD	M
	Sugars and derivatives
	Trehalose	STD	H
	Methylated amino acids
	Dimethyl-histidine	MS/MS	M
	Other amino acid derivatives
	Deferrichrome	STD	L
	Ferrichrome	STD	H
	Histidinol	STD	M
	S-adenosyl-cysteine	STD	L
	Saccharopine	STD	L
	a Fission yeast cells were grown at 26°C in EMM2 medium with 0.1% glucose (for details see Materials and methods). Status of the compounds was either confirmed by comercially available standard standard (STD) or or careful MS/MS analysis (MS/MS). Peak areas defined as H, high (>108 AU); M, middle (107-108AU); L, low (<107 AU). Compounds detected also in the WBC are marked by .

## Sheet: Table S2
	Table S2. Compounds detected in fission yeast and blooda
	Category	Name	Status	detected m/z b	theoreti-cal m/z c	m/z error (ppm) d	Ionisation e	RT f	In fission yeast	In blood	RBC enriched	New blood component	Blood g	RBC g	WBC g	Fission yeast g
	Nucleotides	3',5'-cAMP	STD	328.046	328.045	0.610959	NEG	7.1					ND	ND	L	L
		ADP	STD	428.036	428.037	1.70364	POS	12.4			R		M	M	H	M
		AMP	STD	348.07	348.07	0.7966	POS	11.5			R		M	M	H	M
		ATP	STD	508.002	508.003	2.18859	POS	13.8			R		H	H	H	H
		CDP	STD	402.012	402.011	2.09292	NEG	14.7			R		L	L	L	L
		CMP	STD	322.045	322.045	2.45767	NEG	13.2					ND	ND	L	L
		CTP	STD	481.98	481.977	5.24907	NEG	15.5			R		L	L	M	M
		GDP	STD	442.018	442.017	2.80393	NEG	15.5			R		L	L	M	M
		GMP	STD	362.051	362.051	0.378252	NEG	14.1			R		L	L	M	L
		GTP	STD	521.985	521.983	3.23857	NEG	16.4			R		M	M	H	M
		IMP	STD	349.054	349.054	1.21718	POS	13.1			R		L	L	M	L
		UDP	STD	402.996	402.995	1.54774	NEG	14			R		L	L	M	M
		UMP	STD	323.029	323.029	0.79209	NEG	12.6			R		L	L	M	L
		UTP	STD	482.963	482.961	3.57543	NEG	15.1			R		L	L	M	H
	Nucleosides, nucleobases and derivatives	1-Methyl-adenosine	STD	282.119	282.12	1.02344	POS	11.1					M	L	L	M
		1-Methyl-guanosine	STD	298.114	298.115	0.77761	POS	7.1					L	L	L	L
		Adenine	STD	136.061	136.062	2.81818	POS	6.6					L	L	L	M
		Adenosine	STD	268.104	268.104	0.988631	POS	6.2					L	L	M	L
		AICAR	STD	337.055	337.055	0.995051	NEG	12.7					ND	ND	ND	L
		Caffeine	STD	195.086	195.088	1.49007	POS	3.8					M	M	L	ND
		Cytidine	STD	244.092	244.093	1.23304	POS	9.1					L	L	L	L
		Dimethyl-guanosine	STD	312.13	312.13	1.19186	POS	6					L	L	L	L
		Dimethyl-xanthine	STD	181.072	181.072	1.20681	POS	4.5					M	M	L	ND
		Guanosine	STD	282.084	282.084	0.666411	NEG	9.8					L	L	L	L
		Hypoxanthine	STD	135.03	135.031	7.62961	NEG	7.6					L	L	M	L
		Inosine	STD	269.088	269.088	1.31846	POS	8.2					L	L	L	L
		PRPP	STD	388.945	388.945	1.18324	NEG	16.5					ND	ND	L	M
		SAICAR	MS/MS	455.082	455.081	3.58627	POS	17.1					ND	ND	ND	L
		Uracil	STD	111.02	111.02	2.51973	NEG	7.2					L	L	L	L
		Urate	STD	167.021	167.021	3.69807	NEG	10.7					M	M	L	ND
		Uridine	STD	243.062	243.062	2.31842	NEG	7.1					L	L	L	L
	Vitamins, coenzymes	4-Aminobenzoate	STD	138.055	138.055	3.13075	POS	7.2					L	L	ND	ND
		Acetyl-CoA	STD	810.131	810.133	1.85285	POS	10.5					ND	ND	L	L
		Biotin	STD	245.095	245.095	1.59389	POS	6.2					ND	ND	ND	L
		CoA	STD	768.121	768.122	1.70965	POS	11.7					ND	ND	L	L
		FAD	STD	786.162	786.164	2.46198	POS	9.4					ND	ND	L	L
		HMG-CoA	STD	912.162	912.165	1.91828	POS	13.2					ND	ND	L	L
		NAD+	STD	664.115	664.116	2.34159	POS	11.9			R		M	M	M	H
		NADH	STD	666.131	666.132	2.14681	POS	11.1			R		L	L	L	M
		NADP+	STD	744.081	744.083	1.53403	POS	14.4			R		L	L	L	L
		NADPH	STD	746.097	746.098	1.92974	POS	14.8			R		L	L	L	L
		Nicotinamide	STD	123.055	123.055	3.54318	POS	4.7			R		M	M	M	M
		Pantothenate	STD	220.118	220.118	0.945497	POS	6.1					L	L	L	M
	Nucleotide-sugar derivatvies	GDP-glucose	STD	606.083	606.084	1.58575	POS	15.5			R		L	L	L	M
		UDP-acetyl-glucosamine	STD	606.077	606.074	4.58283	NEG	12.8			R		L	L	M	M
		UDP-glucose	STD	565.05	565.048	3.80383	NEG	13.9			R		M	M	M	H
		UDP-glucuronate	STD	579.029	579.027	3.6224	NEG	16.5			R		L	L	M	ND
	Sugar phosphates	6-Phosphogluconate	STD	275.017	275.017	1.07657	NEG	15			R		L	L	L	L
		Diphospho-glycerate	STD	264.951	264.952	2.60799	NEG	15.6			R		H	H	L	L
		Fructose-1,6-diphosphate	STD	338.989	338.989	0.0807053	NEG	15.5			R		M	M	M	M
		Fructose-6-phosphate	STD	259.022	259.022	1.73231	NEG	13.3			R		L	L	L	M
		Glucose-6-phosphate	STD	259.022	259.022	2.35353	NEG	14.2			R		M	M	M	M
		Glyceraldehyde-3-phosphate	STD	168.991	168.991	1.20137	NEG	13.2			R		L	L	L	L
		Glycerol-2-phosphate	STD	171.006	171.006	1.98677	NEG	12.2			R		L	L	L	M
		Pentose-phosphate	STD	229.011	229.012	2.71926	NEG	13			R		L	L	L	M
		Phosphoenolpyruvate	STD	166.975	166.975	0.982687	NEG	15.1			R		L	L	L	M
		Phosphoglycerate	STD	184.985	184.986	1.77965	NEG	14.4			R		M	M	L	M
		Sedoheptulose-7-phosphate	STD	289.033	289.033	0.669547	NEG	13.7			R		L	L	L	M
		Trehalose-6-phosphate	STD	421.076	421.075	3.31192	NEG	14.7					ND	ND	ND	M
	Sugar and derivatives	1,5-Anhydroglucitol	STD	163.061	163.061	0.75452	NEG	9.2					M	M	L	ND
		Gluconate	STD	195.051	195.051	1.93535	NEG	11.4			R		M	M	L	L
		Glucosamine	STD	180.087	180.087	1.66459	POS	11.6					M	M	ND	L
		Glucose	STD	179.056	179.056	1.88064	NEG	12					M	M	ND	L
		myo-Inositol	STD	179.056	179.056	1.19044	NEG	14.4					L	L	M	L
		N-Acetyl-D-glucosamine	STD	222.097	222.097	1.31432	POS	9.3			R		M	M	L	L
		Quinic acid	STD	191.056	191.056	2.10583	NEG	10.4					L	L	L	M
		Trehalose	STD	341.109	341.109	0.403189	NEG	13.6					ND	ND	ND	H
	Organic acids	2-Oxoglutarate	STD	145.014	145.014	0.659921	NEG	12.9					L	L	L	L
		Chenodeoxycholate	STD	391.286	391.285	0.570116	NEG	3.9					M	M	L	ND
		cis-Aconitate	STD	175.023	175.024	1.4273	POS	15.5					L	L	L	L
		Citramalate	STD	147.03	147.03	0.915689	NEG	12.6			R		L	L	M	M
		Citrate	STD	191.02	191.02	1.44509	NEG	15.5					M	L	M	M
		Fumarate	STD	115.004	115.004	1.59277	NEG	13.1			R		L	L	L	L
		Glutarate	STD	131.035	131.035	0.216093	NEG	12					L	L	L	L
		Glyceric acid	STD	105.02	105.019	2.65799	NEG	10.1					L	L	L	ND
		Malate	STD	133.014	133.014	0.359911	NEG	13.3			R		L	L	L	L
		Succinate	STD	117.019	117.019	0.939218	NEG	12.6					L	L	L	L
	Standard amino acids	Arginine	STD	175.119	175.119	1.87841	POS	24.8					H	M	M	H
		Asparagine	STD	131.046	131.046	0.892412	NEG	12.4					L	L	L	L
		Aspartate	STD	132.03	132.03	0.247854	NEG	12.5			R		L	L	M	M
		Glutamate	STD	146.046	146.046	2.1196	NEG	12.1			R		M	M	M	H
		Glutamine	STD	147.076	147.076	2.30972	POS	12.2					H	H	M	H
		Histidine	STD	156.076	156.077	2.35458	POS	12					M	M	L	H
		Isoleucine	STD	130.087	130.087	0.150809	NEG	8.6					M	M	L	L
		Leucine	STD	130.087	130.087	0.707588	NEG	7.6					M	M	L	L
		Lysine	STD	145.098	145.098	0.768917	NEG	23.3					L	L	L	L
		Methionine	STD	150.058	150.058	2.29269	POS	8.7					M	M	M	L
		Phenylalanine	STD	166.086	166.086	1.86601	POS	7.3					H	H	M	M
		Proline	STD	116.07	116.071	3.47297	POS	10.2					H	H	H	L
		Serine	STD	104.036	104.035	2.23842	NEG	13.1					L	L	L	L
		Threonine	STD	120.065	120.066	3.39462	POS	11.7					M	M	M	M
		Tryptophan	STD	205.097	205.097	1.55553	POS	8.7					M	M	M	M
		Tyrosine	STD	182.081	182.081	1.85042	POS	10.3					M	M	L	M
		Valine	STD	118.086	118.086	3.8139	POS	9.8					M	M	M	L
	Methylated amino acids	Betaine	STD	118.086	118.086	3.6465	POS	8.6					H	H	H	L
		Butyro-betaine	STD	146.117	146.118	1.88973	POS	10.9			R		M	M	M	ND
		Dimethyl-arginine	STD	203.15	203.15	1.5826	POS	20					L	L	L	L
		Dimethyl-histidine	STD	184.108	184.108	2.46175	POS	9.7					ND	ND	ND	M
		Dimethyl-lysine	STD	175.144	175.144	0.129124	POS	19.2					L	L	L	L
		Dimethyl-proline (stachydrine)	STD	144.102	144.102	2.58935	POS	7.9			R		H	H	M	ND
		Methyl-histidine	STD	170.092	170.092	1.21817	POS	10.2					L	L	L	M
		Methyl-lysine	MS/MS	161.128	161.128	0.50683	POS	22.1					M	L	L	L
		S-Methyl-ergothioneine	STD	244.111	244.111	0.325584	POS	7.9			R		L	M	L	ND
		Trimethyl-histidine (hercynine)	MS/MS	198.123	198.124	1.49924	POS	9.7			R		L	L	L	M
		Trimethyl-lysine	STD	189.159	189.16	1.93066	POS	20.7			R		M	M	L	L
		Trimethyl-phenylalanine	MS/MS	208.133	208.133	0.389293	POS	5.4			R		L	L	ND	ND
		Trimethyl-tryptophan (hypaphorine)	STD	247.144	247.144	0.770054	POS	6			R		H	H	M	ND
		Trimethyl-tyrosine	MS/MS	224.128	224.128	0.412355	POS	7.5			R		L	L	L	ND
	Acetylated amino acids	N-Acetyl-(iso)leucine	STD	174.112	174.112	0.788943	POS	4.4					L	L	L	L
		N-Acetyl-arginine	STD	217.129	217.13	1.52799	POS	12.3					L	L	L	M
		N-Acetyl-aspartate	STD	174.04	174.041	2.03346	NEG	12.5					L	L	L	L
		N-Acetyl-glutamate	STD	190.071	190.071	1.40728	POS	11.6					L	L	L	M
		N-Acetyl-ornithine	STD	175.107	175.108	1.8262	POS	11.1					L	L	L	L
		N2-Acetyl-lysine	STD	189.123	189.123	2.52263	POS	12.7					L	L	ND	L
		N6-Acetyl-lysine	STD	189.123	189.123	0.96523	POS	10.5					L	L	L	M
	Other amino acid derivatives	2-Aminoadipate	STD	162.076	162.076	1.50084	POS	12.2					L	L	L	L
		Arginino-succinate	STD	291.129	291.13	0.400957	POS	14.2					L	L	L	M
		Citrulline	STD	176.103	176.103	1.70169	POS	13					M	M	M	M
		Creatine	STD	132.076	132.077	4.04801	POS	12.1			R		H	H	H	ND
		Creatinine	STD	114.066	114.066	3.92665	POS	6.9					H	H	M	ND
		Deferrichrome	STD	688.324	688.326	2.38624	POS	5.9					ND	ND	ND	L
		Ferrichrome	STD	741.236	741.238	2.05672	POS	4.7					ND	ND	ND	H
		Glutamate methyl ester	STD	162.076	162.076	1.56931	POS	7.1					L	L	L	L
		Hippurate	STD	180.065	180.066	0.931527	POS	4.4					M	L	L	ND
		Histamine	STD	112.086	112.087	4.2107	POS	24.8					L	L	M	L
		Histidinol	STD	142.097	142.097	2.8083	POS	16.3					ND	ND	ND	M
		Indoxyl-sulfate	STD	212.002	212.002	2.5555	NEG	4.9					M	M	L	ND
		Kynurenine	STD	209.092	209.092	0.756372	POS	8					L	L	L	ND
		Ornithine	STD	131.083	131.083	0.162553	NEG	20.8					L	L	L	M
		Phosphocreatine	STD	212.043	212.043	0.167934	POS	12.7			R		L	L	L	ND
		Quinolinic acid	STD	166.014	166.015	1.15745	NEG	12.7					L	L	L	ND
		S-adenosyl-cysteine	STD	371.111	371.113	6.51357	POS	10.6					ND	ND	ND	L
		S-Adenosyl-homocysteine	STD	385.129	385.129	1.3666	POS	11.2			R		L	L	L	M
		S-Adenosyl-methionine	STD	399.143	399.145	2.49004	POS	14.2			R		L	L	L	L
		Saccharopine	STD	275.125	275.125	1.1855	NEG	13.3					ND	ND	ND	L
		Taurine	STD	124.007	124.007	0.788294	NEG	12.1					M	M	H	ND
	Carnitines	Acetyl-carnitine	STD	204.123	204.123	1.70276	POS	8.5			R		H	H	H	ND
		Butyryl-carnitine	STD	232.154	232.154	0.798886	POS	6.2					M	M	M	ND
		Carnitine	STD	162.112	162.112	2.04957	POS	10.9					H	H	H	ND
		Decanoyl-carnitine	STD	316.248	316.248	0.546588	POS	4.2					M	M	L	ND
		Dodecanoyl-carnitine	STD	344.279	344.28	1.40114	POS	3.8					L	L	L	ND
		Hexanoyl-carnitine	STD	260.186	260.186	4.08208	POS	4.8					L	L	L	ND
		Isovaleryl-carnitine	STD	246.17	246.17	1.22713	POS	5.4					L	L	L	ND
		Octanoyl-carnitine	STD	288.219	288.217	2.76393	POS	4.1					M	L	L	ND
		Propionyl-carnitine	STD	218.138	218.139	1.15007	POS	7.2			R		M	M	M	ND
		Tetradecanoyl-carnitine	STD	372.311	372.311	0.437986	POS	3.8			R		L	L	L	ND
	Choline derivatives	CDP-choline	STD	489.113	489.115	2.51559	POS	13					L	L	H	L
		Glycerophosphocholine	STD	258.11	258.11	1.16606	POS	12.1					M	M	H	H
	Antioxidant	Ergothioneine	STD	230.095	230.096	1.17997	POS	12.1			R		H	H	M	M
		Glutathione disulfide (GSSG)	STD	613.158	613.159	1.68931	POS	15			R		H	H	H	H
		Ophthalmic acid	STD	290.134	290.135	0.551964	POS	11.2			R		L	M	L	M
	a From total 151 compounds 133 were detected in blood and 119 were detected in fission yeast. b Detected m/z values are averaged across multiple samples (human and fission yeast). c Theoretical m/z values were calculated from ion formula. d Difference between detected and theoretical m/z values is provided in ppm. e Ions were detected either in positive (POS) or negative (NEG) ionisation mode. f …

## Sheet: Table S3a
	Table S3. List of analyzed standard compoundsa
	Compound	Vendor	Name	Catalog #
	1,5-Anhydroglucitol	Wako	1,5-Anhydro-D-glucitol	016-13531
	4-Aminobenzoate	Sigma-Aldrich	4-aminobenzoic acid	A9878
	Acetyl-carnitine	Sigma-Aldrich	Acetyl-L-Carnitine Chloride	17-0200-7
	Arginino-succinate	Sigma-Aldrich	Argininosuccinic acid disodium salt hydrate	A5707
	Butyro-betaine	Sigma-Aldrich	(3-Carboxypropyl)trimethylammonium chloride	403245
	Butyryl-carnitine	Wako	Butyryl-L-Carnitine Chloride	17-0400-7
	Caffeine	Sigma-Aldrich	Caffeine	C0750
	Carnitine	Sigma-Aldrich	L-Carnitine	C0283
	CDP-choline	Sigma-Aldrich	Cytidine 5′-diphosphocholine sodium salt dihydrate	C0256
	Chenodeoxycholate	Sigma-Aldrich	Chenodeoxycholic acid	C9377
	cis-Aconitate	Sigma-Aldrich	cis-Aconitic acid	A3412
	Creatine	Wako	Creatine	A17477
	Creatinine	Wako	Creatinine	033-04591
	Decanoyl-carnitine	Wako	Decanoyl-L-Carnitine Chloride	17-1000-7
	Dimethyl-proline (stachydrine)	TCI	Stachydrine Hydrochloride	S0358
	Dimethyl-xanthine	Sigma-Aldrich	1,7-Dimethylxanthine	D5385
	Diphospho-glycerate	Sigma-Aldrich	2,3-Diphospho-D-glyceric acid pentasodium salt	D5764
	Dodecanoyl-carnitine	Wako	Lauroyl-L-Carnitine Chloride	17-1200-7
	Glyceraldehyde-3-phosphate	Sigma-Aldrich	DL-Glyceraldehyde 3-phosphate solution	G5251
	Glycerate	Sigma-Aldrich	DL-Glyceric acid hemicalcium salt hydrate	G5000
	Glycerophosphocholine	Santa Cruz Bio	sn-Glycero-3-phosphocholine	sc-301813
	Hexanoyl-carnitine	Wako	Hexanoyl-L-Carnitine Chloride	17-0600-7
	Hippurate	Sigma-Aldrich	Hippuric acid	112003
	Histamine	Sigma-Aldrich	Histamine	H7125
	Hypoxanthine	Sigma-Aldrich	Hypoxanthine	H9377
	Indoxyl-sulfate	Sigma-Aldrich	Indoxyl sulfate potassium salt	I3875
	Isovaleryl-carnitine	Wako	Isovaleryl-L-Carnitine Chloride	17-0550-7
	Kynurenine	Sigma-Aldrich	L-kynurenine	K8625
	Methyl-histidine	Sigma-Aldrich	1-Methyl-L-histidine	67520
	myo-Inositol	Wako	myo- Inositol	092-00282
	N-acetyl-aspartate	Fluka	N-Acetyl-L-aspartic acid	920
	N-acetyl-D-glucosamine	Sigma-Aldrich	N-Acetyl-D-glucosamine	A8625
	N-acetyl-isoleucine	Sigma-Aldrich	N-ACETYL-L-ISOLEUCINE	S783501
	Octanoyl-carnitine	Wako	Octanoyl-L-Carnitine Chloride	17-0800-7
	Phosphocreatine	Wako	Disodium Creatinephosphate Tetrahydrate	922-32-7
	Propionyl-carnitine	Wako	Propionyl-L-Carnitine Chloride	17-0300-7
	Quinolinic acid	Wako	2, 3-pyridinedicarboxylic acid (Quinolinic acid)	174-00271
	S-Methyl-ergothioneine	Tetrahedron	S-Methyl-L-ergothioneine	THD-300
	Sedoheptulose-7-phosphate	Sigma-Aldrich	D-Sedoheptulose 7-phosphate lithium salt	78832
	Succinate	Sigma-Aldrich	Succinic acid	S3674
	Taurine	Sigma-Aldrich	Taurine	T0625
	Tetradecanoyl-carnitine	Wako	Myristoyl-L-Carnitine Chloride	17-1400-7
	Trimethyl-tryptophan (hypaphorine)	Research Plus	Hypaphorine HCL	08-8016-17
	UDP-glucuronate	Sigma-Aldrich	Uridine 5′-diphosphoglucuronic acid trisodium salt	U6751
	Urate	Sigma-Aldrich	Uric acid	U0881
	Uridine	Sigma-Aldrich	Uridine	U3750
	a Previously reported standard compounds vendors can be found in Pluskal et al. 2010
